# Supplementary material for: NeuroMabSeq: high volume acquisition, processing, and curation of hybridoma sequences and their use in generating recombinant monoclonal antibodies and scFvs for neuroscience research
Source: PubMed Central journal article supplement — bioRxiv. 2023 Jun 30:2023.06.28.546392. Preprint. [Version 1] doi: 10.1101/2023.06.28.546392 (PMC10327083; doi:10.1101/2023.06.28.546392), 2023-06-30
Supplement: media-2.pdf [file media-2.pdf]

**Supplementary Table 1. List of primers and barcodes.**

| Oligonucleotide                             | Vendor | Cat #     | Sequence                                      |
|---------------------------------------------|--------|-----------|-----------------------------------------------|
| RT Chain Specific Outer Primer mix          |        |           |                                               |
| RT-mIGK                                     | IDT    | 271038654 | TTGTCGTTCACTGCCATCAAT*C                       |
| RT-mIGHG                                    | IDT    | 271038655 | AGCTGGGAAGGTGTGCACA*C                         |
| RT-mIGL                                     | IDT    | 271038656 | GGGGTACCATCTACCTTCCA*C                        |
| RT-mIGHG3-NEW                               | IDT    | 271038657 | GTACAGATGAGACTGTGCGCACA*C                     |
|                                             |        |           |                                               |
| TSO-short                                   | IDT    | 408473058 | /5Biosg/AAGCAGTGGTATCAACGCAGAGTACA<br>TrGrGrG |
|                                             |        |           |                                               |
| PCR Chain Specific Reverse Inner Primer Mix |        |           |                                               |
| 10for-mIgh3                                 | IDT    | 270929982 | GGATAGACAGATGGGGCTGTTGTTGTAG*C                |
| PCR-R-mIGL                                  | IDT    | 270929983 | ATCGTACACACCAGTGTGG*C                         |
| 6-REV-LC                                    | IDT    | 270929984 | GGATACAGTTGGTGCAGCAT*C                        |
| 10-REV-HC1                                  | IDT    | 270929985 | ATAGACAGATGGGGGTGTCGTTTTGG*C                  |

| F Primer, ISPCR (Barcoded) PCR-SMART indices | Sequence                        |
|----------------------------------------------|---------------------------------|
| 01-SMARTindex                                | CAGCGTCAGTGGTATCAACGCAGAGTACA   |
| 02-SMARTindex                                | GATCACCAGTGGTATCAACGCAGAGTACA   |
| 03-SMARTindex                                | ACCAGTCAGTGGTATCAACGCAGAGTACA   |
| 04-SMARTindex                                | TGCACGCAGTGGTATCAACGCAGAGTACA   |
| 05-SMARTindex                                | ACATTACAGTGGTATCAACGCAGAGTACA   |
| 06-SMARTindex                                | GTGTAGCAGTGGTATCAACGCAGAGTACA   |
| 07-SMARTindex                                | CTAGTCCAGTGGTATCAACGCAGAGTACA   |
| 08-SMARTindex                                | TGTGCACAGTGGTATCAACGCAGAGTACA   |
| 09-SMARTindex                                | TCAGGAACAGTGGTATCAACGCAGAGTACA  |
| 10-SMARTindex                                | CGGTAAACAGTGGTATCAACGCAGAGTACA  |
| 11-SMARTindex                                | TTAACTACAGTGGTATCAACGCAGAGTACA  |
| 12-SMARTindex                                | ATGAACACAGTGGTATCAACGCAGAGTACA  |
| 13-SMARTindex                                | CCTAAGACAGTGGTATCAACGCAGAGTACA  |
| 14-SMARTindex                                | AATCCGACAGTGGTATCAACGCAGAGTACA  |
| 15-SMARTindex                                | GGCTGCACAGTGGTATCAACGCAGAGTACA  |
| 16-SMARTindex                                | TACCTTACAGTGGTATCAACGCAGAGTACA  |
| 17-SMARTindex                                | TCTTAATCAGTGGTATCAACGCAGAGTACA  |
| 18-SMARTindex                                | GTCAGGTCAGTGGTATCAACGCAGAGTACA  |
| 19-SMARTindex                                | ATACTGTCAGTGGTATCAACGCAGAGTACA  |
| 20-SMARTindex                                | TATGTCTCAGTGGTATCAACGCAGAGTACA  |
| 21-SMARTindex                                | GAGTCCTCAGTGGTATCAACGCAGAGTACA  |
| 22-SMARTindex                                | GGAGGTTCAAGTGGTATCAACGCAGAGTACA |
| 23-SMARTindex                                | CACACTTCAGTGGTATCAACGCAGAGTACA  |
| 24-SMARTindex                                | CCGCAATCAGTGGTATCAACGCAGAGTACA  |
| 25-SMARTindex                                | TTTATGCAGTGGTATCAACGCAGAGTACA   |
| 26-SMARTindex                                | AACGCCACAGTGGTATCAACGCAGAGTACA  |
| 27-SMARTindex                                | CAAGCACAGTGGTATCAACGCAGAGTACA   |
| 28-SMARTindex                                | GCTCGACAGTGGTATCAACGCAGAGTACA   |
| 29-SMARTindex                                | GCGAATCAGTGGTATCAACGCAGAGTACA   |
| 30-SMARTindex                                | TGGATTCAAGTGGTATCAACGCAGAGTACA  |
| 31-SMARTindex                                | ACCTACCAGTGGTATCAACGCAGAGTACA   |
| 32-SMARTindex                                | CGAAGGCAGTGGTATCAACGCAGAGTACA   |
| 33-SMARTindex                                | AGATAGAACAGTGGTATCAACGCAGAGTACA |
| 34-SMARTindex                                | TTGGTAAACAGTGGTATCAACGCAGAGTACA |

|               |                                 |
|---------------|---------------------------------|
| 35-SMARTindex | GTTACCAACAGTGGTATCAACGCAGAGTACA |
| 36-SMARTindex | CGCAACAACAGTGGTATCAACGCAGAGTACA |
| 37-SMARTindex | TGGCGAAACAGTGGTATCAACGCAGAGTACA |
| 38-SMARTindex | ACCGTGAACAGTGGTATCAACGCAGAGTACA |
| 39-SMARTindex | CAACAGAACAGTGGTATCAACGCAGAGTACA |
| 40-SMARTindex | GATTGTAACAGTGGTATCAACGCAGAGTACA |
| 41-SMARTindex | CTCTCGATCAGTGGTATCAACGCAGAGTACA |
| 42-SMARTindex | TGACACATCAGTGGTATCAACGCAGAGTACA |
| 43-SMARTindex | AAGACAATCAGTGGTATCAACGCAGAGTACA |
| 44-SMARTindex | ACAGATATCAGTGGTATCAACGCAGAGTACA |
| 45-SMARTindex | TAGGCTATCAGTGGTATCAACGCAGAGTACA |
| 46-SMARTindex | CTCCATATCAGTGGTATCAACGCAGAGTACA |
| 47-SMARTindex | GCATGGATCAGTGGTATCAACGCAGAGTACA |
| 48-SMARTindex | AATAGCATCAGTGGTATCAACGCAGAGTACA |
| 49-SMARTindex | GTGCCATACAGTGGTATCAACGCAGAGTACA |
| 50-SMARTindex | TCGAGGTACAGTGGTATCAACGCAGAGTACA |
| 51-SMARTindex | CACTAATACAGTGGTATCAACGCAGAGTACA |
| 52-SMARTindex | GGTATATACAGTGGTATCAACGCAGAGTACA |
| 53-SMARTindex | CGCCTGTACAGTGGTATCAACGCAGAGTACA |
| 54-SMARTindex | AATGAATACAGTGGTATCAACGCAGAGTACA |
| 55-SMARTindex | ACAACGTACAGTGGTATCAACGCAGAGTACA |
| 56-SMARTindex | ATATCCTACAGTGGTATCAACGCAGAGTACA |
| 57-SMARTindex | AGTACTCAGTGGTATCAACGCAGAGTACA   |
| 58-SMARTindex | ATAAGACAGTGGTATCAACGCAGAGTACA   |
| 59-SMARTindex | GGTGAGCAGTGGTATCAACGCAGAGTACA   |
| 60-SMARTindex | TTCCGCCAGTGGTATCAACGCAGAGTACA   |
| 61-SMARTindex | GAAGTGCAGTGGTATCAACGCAGAGTACA   |
| 62-SMARTindex | CAATGCCAGTGGTATCAACGCAGAGTACA   |
| 63-SMARTindex | ACGTCTCAGTGGTATCAACGCAGAGTACA   |
| 64-SMARTindex | CAGGACCAGTGGTATCAACGCAGAGTACA   |
| 65-SMARTindex | AAGCTCCAGTGGTATCAACGCAGAGTACA   |
| 66-SMARTindex | GACGATCAGTGGTATCAACGCAGAGTACA   |
| 67-SMARTindex | TCGTTCCAGTGGTATCAACGCAGAGTACA   |
| 68-SMARTindex | CCAATTCAGTGGTATCAACGCAGAGTACA   |
| 69-SMARTindex | AGTTGACAGTGGTATCAACGCAGAGTACA   |
| 70-SMARTindex | AACCGACAGTGGTATCAACGCAGAGTACA   |
| 71-SMARTindex | CAGATGCAGTGGTATCAACGCAGAGTACA   |
| 72-SMARTindex | GTAGAACAGTGGTATCAACGCAGAGTACA   |
| 73-SMARTindex | GACATCACAGTGGTATCAACGCAGAGTACA  |
| 74-SMARTindex | CGATCTACAGTGGTATCAACGCAGAGTACA  |
| 75-SMARTindex | CGTCGCACAGTGGTATCAACGCAGAGTACA  |
| 76-SMARTindex | ATGGCGACAGTGGTATCAACGCAGAGTACA  |
| 77-SMARTindex | ATTGGTACAGTGGTATCAACGCAGAGTACA  |
| 78-SMARTindex | GCCACAACAGTGGTATCAACGCAGAGTACA  |
| 79-SMARTindex | CATCTAACAGTGGTATCAACGCAGAGTACA  |
| 80-SMARTindex | AACAAGACAGTGGTATCAACGCAGAGTACA  |
| 81-SMARTindex | GCAGCCTCAGTGGTATCAACGCAGAGTACA  |
| 82-SMARTindex | ACTCTTTCAGTGGTATCAACGCAGAGTACA  |
| 83-SMARTindex | TGCTATTCAGTGGTATCAACGCAGAGTACA  |
| 84-SMARTindex | AAGTGGTCAGTGGTATCAACGCAGAGTACA  |
| 85-SMARTindex | CTCATATCAGTGGTATCAACGCAGAGTACA  |
| 86-SMARTindex | CCGACCTCAGTGGTATCAACGCAGAGTACA  |
| 87-SMARTindex | GGCCAATCAGTGGTATCAACGCAGAGTACA  |

|               |                                |
|---------------|--------------------------------|
| 88-SMARTindex | AGACCATCAGTGGTATCAACGCAGAGTACA |
| 89-SMARTindex | CGCGGACAGTGGTATCAACGCAGAGTACA  |
| 90-SMARTindex | CCTGCTCAGTGGTATCAACGCAGAGTACA  |
| 91-SMARTindex | GCGCTGCAGTGGTATCAACGCAGAGTACA  |
| 92-SMARTindex | GAACCTCAGTGGTATCAACGCAGAGTACA  |
| 93-SMARTindex | TTCGAGCAGTGGTATCAACGCAGAGTACA  |
| 94-SMARTindex | AGAATCCAGTGGTATCAACGCAGAGTACA  |
| 95-SMARTindex | AGGCATCAGTGGTATCAACGCAGAGTACA  |
| 96-SMARTindex | ACACGCCAGTGGTATCAACGCAGAGTACA  |

**Supplementary Table 1.** Top table. Sequences of oligonucleotides used for priming cDNA synthesis and for amplification of V<sub>L</sub> and V<sub>H</sub> domains. Bottom table. Sequences of oligonucleotides used to barcode samples.
