# Supplementary material for: NeuroMabSeq: high volume acquisition, processing, and curation of hybridoma sequences and their use in generating recombinant monoclonal antibodies and scFvs for neuroscience research
Source: PubMed Central journal article supplement — bioRxiv. 2023 Jun 30:2023.06.28.546392. Preprint. [Version 1] doi: 10.1101/2023.06.28.546392 (PMC10327083; doi:10.1101/2023.06.28.546392), 2023-06-30
Supplement: media-3.pdf [file media-3.pdf]

**Supplementary Table 2. List of R-mAbs successfully cloned via sequence-based cloning.**

| R-mAb    | Target                                   | R-mAb     | Target                                 | R-mAb    | Target                           | R-mAb    | Target                             |
|----------|------------------------------------------|-----------|----------------------------------------|----------|----------------------------------|----------|------------------------------------|
| 1D8      | LRRK2/Dardarin-pSer910                   | L114/3    | Parvalbumin                            | N133/35  | RGS14                            | N358/68  | 5-formylcytidine                   |
| 1F1      | TrpC1                                    | L114/38   | Parvalbumin                            | N134/12  | Nav1.8 Na <sup>+</sup> channel   | N360A/24 | ATF4                               |
| 62-3G1   | GABA(A)R, Beta2/3                        | L114/81   | Parvalbumin                            | N138/6   | LRRK2/Dardarin, N-terminus       | N363/71  | Kir6.2 K <sup>+</sup> channel      |
| 8G10     | LRRK2/Dardarin, N-terminus               | L115/13   | NPY Neuropeptide Y                     | N140A/12 | SALM5/LRFN5                      | N364/10  | Bral1                              |
| A12/18   | Pan-Neurofascin (extracellular)          | L117/1    | IRSp53/BAIAP2                          | N141/21  | HCN3                             | N364/42  | Bral1                              |
| D4/11    | Kv2.1 K <sup>+</sup> channel             | L117/52   | IRSp53/BAIAP2                          | N141/28  | HCN3                             | N366/60  | Kir6.1 K <sup>+</sup> channel      |
| D4/154   | Kv2.1 K <sup>+</sup> channel             | L118/14   | VGAT                                   | N142/28  | GRK6A/B                          | N367/51  | Shank1 and Shank3                  |
| D4/40    | Kv2.1 K <sup>+</sup> channel             | L118/80   | VGAT                                   | N143/36  | CDY1/2/L1/L2                     | N367/62  | Shank3                             |
| K14/39   | Kv1.2 K <sup>+</sup> channel             | L118/135  | VGAT                                   | N143/38  | CDY1/2                           | N372A/1  | Kv2.2 K <sup>+</sup> channel       |
| K19/46   | Kv1.6 K <sup>+</sup> channel             | L119/106  | NPY2R Neuropeptide Y receptor type 2   | N144/14  | 6xHis                            | N372B/1  | Kv2.2 K <sup>+</sup> channel       |
| K28/25   | PSD-95 + PSD-93                          | L119/134* | NPY2R Neuropeptide Y receptor type 2   | N144/17  | Gamma-protocadherin-A3           | N372B/60 | Kv2.2 K <sup>+</sup> channel       |
| K28/27   | PSD-95                                   | L120/12   | Collybistin                            | N144/32  | Pan-Gamma-protocadherin-A        | N372C/51 | Kv2.2 K <sup>+</sup> channel       |
| K28/38   | PSD-95                                   | L120/30   | Collybistin                            | N145/20  | Pan-GRK                          | N374/48  | TASK1 K <sup>+</sup> channel       |
| K28/42   | PSD-95 + PSD-93                          | L121/25   | nNOS/NOS1                              | N148/30  | Gamma-protocadherin-B2           | N375/67  | Kv3.3 K <sup>+</sup> channel       |
| K28/58   | PSD-95                                   | L121/42   | nNOS/NOS1                              | N152B/23 | VDAC1                            | N377/20  | MAP3K12                            |
| K28/74   | PSD-95                                   | L121/133  | nNOS/NOS1                              | N154/32  | JMJD2A                           | N377/83  | MAP3K12                            |
| K28/86   | Pan-MAGUK                                | L121/136  | nNOS/NOS1                              | N155/9   | Uncx                             | N37A/10  | Kv7.1/KCNQ1 K <sup>+</sup> channel |
| K28/94   | PSD-95                                   | L122/6    | Calretinin                             | N158/28  | Histone H3.3                     | N380/87  | CLN3                               |
| K40/17   | Pan-Kvbeta K <sup>+</sup> channel        | L122/68   | Calretinin                             | N159/5   | Pan-Gamma-protocadherin-Constant | N382/14  | MFF                                |
| K47/9    | Kvbeta1.2/KCNA B1 K <sup>+</sup> channel | L122/144  | Calretinin                             | N160/21  | SynDIG3/Tmem91                   | N382/69  | MFF (exon 1)                       |
| K47/42   | Kvbeta1.2/KCNA B1 K <sup>+</sup> channel | L123/46   | GABA(A)R, Theta                        | N161/20  | NKCC1                            | N384/63  | Miro2                              |
| K55/7*   | KChIP1 K <sup>+</sup> channel            | L124/59   | Bassoon                                | N165/38  | LAR/PTPRF                        | N385/21  | Beta1-spectrin                     |
| K55/29   | KChIP1 K <sup>+</sup> channel            | L125/121  | Synapsin-3                             | N165/43  | Pan-PTPR                         | N388A/27 | Ankyrin-R/G                        |
| K55/82   | Pan-KChIP K <sup>+</sup> channel         | L125/129  | Pan-Synapsin                           | N166A/26 | OCRL/INPP5b                      | N389/9   | TRAK1                              |
| K56A/50  | CASK                                     | L125/76   | SAPAP3                                 | N170A/26 | Neurexin-1-Beta                  | N390/43  | TRAK2                              |
| K56A/57  | CASK                                     | L126/93   | SAPAP3                                 | N173B/13 | Tafazzin                         | N391/68  | WNK1                               |
| K57/27   | Kv4.2 K <sup>+</sup> channel (external)  | L127/8    | GAD67                                  | N180/41  | EAAC1                            | N393/2   | Beta4-spectrin                     |
| K57/41   | Kv4.2 K <sup>+</sup> channel (external)  | L127/12   | GAD65/67                               | N183/15  | QKI-7                            | N393/76  | Beta4-spectrin                     |
| K60/73   | KChIP2b K <sup>+</sup> channel           | L130/1    | Tiam1                                  | N185/7   | NALCN                            | N395/68  | Navbeta2 Na <sup>+</sup> channel   |
| K60/87** | KChIP2b K <sup>+</sup> channel           | L131/17   | SPHKAP                                 | N186/29  | Dopamine D2 receptor             | N396/29  | Navbeta3 Na <sup>+</sup> channel   |
| K65/35   | CASPR/Neurexin IV                        | L131/20   | SPHKAP                                 | N191/7   | Fratxin                          | N397/19  | Nav1.5 Na <sup>+</sup> channel     |
| K65A/2   | CASPR/Neurexin IV                        | L131/27   | SPHKAP                                 | N192/12  | Gs protein, alpha subunit        | N398A/34 | GABA(A)R, Alpha4                   |
| K66/27   | KChIP3 K <sup>+</sup> channel            | L132/18   | Cav1.2 Ca <sup>2+</sup> channel pS1928 | N194/11  | QKI-7b                           | N399/19  | GABA(A)R, Alpha2                   |
| K66/59   | KChIP3 K <sup>+</sup> channel            | L132/37   | Cav1.2 Ca <sup>2+</sup> channel pS1928 | N202/7   | Fig4/Sac3                        | N400/24  | CLN6                               |
| K67/11   | CASPR2                                   | N1/12     | KCC2                                   | N206A/8  | GFAP                             | N402/13  | Thyroid hormone receptor beta1     |

|         |                                            |         |                                       |          |                                         |          |                                |
|---------|--------------------------------------------|---------|---------------------------------------|----------|-----------------------------------------|----------|--------------------------------|
| K67/25  | CASPR2                                     | N4/15   | PINK1                                 | N207/27  | LRP4 (extracellular)                    | N402/46  | Thyroid hormone receptor beta1 |
| K69/3*  | Nav1.2 Na+ channel                         | N4/49   | PINK1                                 | N209C/35 | LRRTM2                                  | N403/63  | Pan-Thyroid hormone receptor   |
| K69/33  | Nav1.2 Na+ channel                         | N6/38   | VACHT                                 | N210/5   | PhyH/PAHX                               | N405/74  | Navbeta1 Na+ channel           |
| K73/20  | Contactin/F3                               | N10/7   | Cavbeta4 Ca2+ channel                 | N212/7   | TRIP8b (constant)                       | N406/47  | Cln5                           |
| K74/53  | Nav1.1 Na+ channel                         | N15/4   | TrpV3                                 | N212A/34 | TRIP8b (exon 1b)                        | N408/79  | Npas4                          |
| K75/18  | Kv4.3 K+ channel                           | N15/39  | TrpV3                                 | N219/5   | RBM17/SPF45                             | N410/17  | Kv3.2 K+ channel               |
| K75/30  | Kv4.3 K+ channel                           | N18/28  | PSD-93/Chapsyn-110                    | N221/12  | TrpV1                                   | N411/51  | Arx                            |
| K78/29  | SK2 K+ channel                             | N18/30  | PSD-93/Chapsyn-110                    | N221/17  | TrpV1                                   | N414/25  | NCKX4                          |
| K87A/10 | Nav1.6 Na+ channel                         | N19/2   | SAP102                                | N225A/10 | FGF13/FHF2, B isoform                   | N416/57  | GluN3A/NR3A glutamate receptor |
| K89/41  | Kv2.1 K+ channel                           | N22/21  | Shank1                                | N227/21  | MECP2                                   | N420/24  | EAAC1                          |
| K96/7   | Pancortin                                  | N23B/6  | Shank2                                | N228A/16 | Lhx6.1                                  | N421A/85 | ANO5/TMEM16E                   |
| L6/48   | Slo1/BKAlpha maxi-K+ channel               | N25/35  | Kir2.3 K+ channel                     | N229A/32 | GABA(A)R, Alpha6                        | N422/18  | GluN2C/NR2C glutamate receptor |
| L6/60   | Slo1/BKAlpha maxi-K+ channel               | N26A/23 | Kv7.2/KCNQ2 K+ channel                | N231B/34 | LRRK2/Dardarin, N3 (non-mouse-reactive) | N423/75  | KChIP4 K+ channel              |
| L21/32  | GluA2/GluR2 glutamate receptor             | N38/8   | Cav1.3 Ca2+ channel                   | N232/9   | PEX7                                    | N424/45  | Glycine receptor Alpha3        |
| L23/27  | Kv1.3 K+ channel                           | N39B/8  | GIT1                                  | N233/8   | PEX6                                    | N424/48* | Glycine receptor Alpha3L       |
| L24/1   | IP3 receptor, type 1                       | N43/6   | Kv7.4/KCNQ4 K+ channel                | N238/29  | SAPAP1                                  | N425/45  | VACHT                          |
| L24/11  | IP3 receptor, type 1                       | N46/30  | ADAM22 (cytoplasmic)                  | N238/30  | SAPAP1                                  | N428/12  | WRN                            |
| L24/18  | IP3 receptor, type 1                       | N49A/21 | NGL-1/LRRC4C                          | N238/31  | SAPAP1/2                                | N429/19  | ANO6/TMEM16F                   |
| L24/19  | IP3 receptor, type 1                       | N50/36  | NGL-2/LRRC4                           | N241A/34 | LRRK2/Dardarin, C-terminus              | N431/64  | GABA(A)R, Pi                   |
| L24/21  | IP3 receptor, type 1                       | N52B/27 | SALM2/LRFN1                           | N241A/72 | LRRK2/Dardarin, C-terminus              | N432/21  | VSP                            |
| L28/36  | Kv4.2 K+ channel                           | N53/32  | BKbeta2 K+ channel                    | N245/1   | TARPGamma2/Stargazin                    | N432/63  | VSP                            |
| L45/30  | SynCAM1                                    | N55/10  | Cav3.2 Ca2+ channel                   | N245/36  | TARPGamma2/4/8                          | N440/21  | VMAT1                          |
| L48A/9  | Cav1.3 Ca2+ channel                        | N56/9   | S-tag                                 | N245/44  | Thioredoxin                             | N440/61  | VMAT1                          |
| L48A/29 | Cav1.3 Ca2+ channel                        | N56/21  | FGF14/FHF4                            | N250/21  | DNAH7                                   | N441/35  | ADAM11                         |
| L48A/31 | Cav1.3 Ca2+ channel                        | N57/2   | ADAM22 (extracellular)                | N251/14  | DNAH1                                   | N442/28  | Alg13                          |
| L57/23  | Cav1.2/1.3 Ca2+ channel                    | N59/20  | GluN2B/NR2B glutamate receptor        | N253/32  | Notch1                                  | N444/63  | AGPS neo-epitope               |
| L57/46  | Cav1.2/1.3 Ca2+ channel                    | N64A/36 | TrpC7                                 | N255/38  | Nav1.4 Na+ channel                      | N445/27  | TRAAK K+ channel               |
| L57/47  | Cav1.2/1.3 Ca2+ channel                    | N67/15  | TrpC5                                 | N263/31  | Cav1.2 Ca2+ channel                     | N446/80  | CELF4/BRUNO L4                 |
| L58A/6  | Kv2.1 K+ channel                           | N68/6   | Nav1.7 Na+ channel                    | N270/47  | Synaptotagmin-6                         | N447/24  | Kv11.3 K+ channel              |
| L61C/30 | Kv2.1 K+ channel                           | N71/37  | HCN2                                  | N271/44  | ASIC1                                   | N448/88  | Kv8.2 K+ channel               |
| L62/29  | Copper ATPase 2 (Wilson's disease protein) | N72/16  | Kv3.4 K+ channel                      | N274/8   | Synaptotagmin-5                         | N449/73  | VMAT2                          |
| L64/32  | Kv1.2 K+ channel                           | N74/25  | TrpM7                                 | N275/14  | Synaptotagmin-7                         | N450/53* | BDNF                           |
| L71/5   | Kv1.4 K+ channel (extracellular)           | N75/3   | mGluR1/5 (Group I) glutamate receptor | N276A/15 | Synaptotagmin-9                         | N451/73  | ICK                            |
| L71/22  | Kv1.4 K+ channel (extracellular)           | N75/33  | mGluR1/5 (Group I) glutamate receptor | N283/7   | Lgi1                                    | N452/30  | GABA(A)R, Gamma2L/S            |
| L76/36  | Kv1.2 K+ channel                           | N77/15  | TrpC4                                 | N286/74  | Zebrafish PSD Marker                    | N452/69  | GABA(A)R, Gamma2L              |

|          |                        |          |                                                 |           |                                |          |                          |
|----------|------------------------|----------|-------------------------------------------------|-----------|--------------------------------|----------|--------------------------|
| L80/21   | Kv2.1 K+ channel       | N81/2    | GABA(B)R2                                       | N290B/25  | ARHGAP4                        | N452/73  | GABA(A)R, Gamma2L/S      |
| L83/11   | Kv2.1 K+ channel       | N86/20   | GFP                                             | N294A/10  | Brevican                       | N452/81  | GABA(A)R, Gamma2L/S      |
| L83/81   | Kv2.1 K+ channel       | N86/44   | GFP                                             | N294A/6   | Brevican                       | N454/91  | ANO3/TMEM16C             |
| L86/2    | AMIGO-1                | N86/8    | GFP                                             | N295B/54  | Arl13b                         | N455/15  | Kir3.3 K+ channel        |
| L86/14   | AMIGO-1                | N87/25   | GABA(A)R, Beta3                                 | N302/10   | BBS3/Arl6                      | N456/39  | Proser1                  |
| L86/33*  | AMIGO-1                | N92/14   | FGF11/FHF3                                      | N304B/115 | BBS5                           | N458/10  | Kv6.4 K+ channel         |
| L86/36   | AMIGO-1                | N95/35   | GABA(A)R, Alpha1                                | N307/12   | Histone H3-acetyl-Lys56        | N459/84  | SAPAP2                   |
| L100/1   | Kv2.1 K+ channel pS586 | N98/47   | Neuroigin-4                                     | N308/48   | GluN1/NR1 glutamate receptor   | N460/19  | Kv9.2 K+ channel         |
| L102/45  | SynDIG4/Prnt1          | N100/13  | GST                                             | N309A/21  | Histone H4-dimethyl-Arg3       | N461/19  | Kv9.1 K+ channel         |
| L106/4   | Gephyrin               | N104/37  | SNAT1                                           | N312/10   | NSD1                           | N463/52* | DEPDC5                   |
| L106/22  | Gephyrin               | N105/13  | Ankyrin-B                                       | N319A/14  | SUR2A                          | N465/11  | Kir2.4 K+ channel        |
| L106/23  | Gephyrin               | N105/17  | Ankyrin-B                                       | N323A/31  | SUR1 and SUR2B                 | N467/1   | TRESK potassium channel  |
| L106/83  | Gephyrin               | N106/20  | Ankyrin-G                                       | N324/2    | Rem2                           | N468/37  | THIK-2 potassium channel |
| L107/39  | Neuroigin-2            | N106/36* | Ankyrin-G                                       | N325B/65  | THAP1                          | N470/22  | TRPM6                    |
| L107/90* | Neuroigin-2            | N106/65  | Ankyrin-G (staining)                            | N326D/2   | REEP2                          | N471/27  | Kv1.7 K+ channel         |
| L107/93  | Neuroigin-2            | N112/16  | Kir2.1 K+ channel                               | N326D/13  | REEP                           | N472/88  | MIRP4 K+ channel         |
| L107/95  | Neuroigin-2            | N112B/14 | Kir2.1 K+ channel                               | N327/95   | GluN2A/NR2A glutamate receptor | N473/36  | Cavbeta3 Ca2+ channel    |
| L109/39  | Calbindin              | N112B/29 | Kir2.1 K+ channel                               | N327A/38  | GluN2A/NR2A glutamate receptor | N476/9   | ZIP3                     |
| L109/57  | Calbindin              | N119/44  | MPP8                                            | N330A/80  | Alpha-2C adrenergic receptor   | N479/107 | VAPA/B                   |
| L109/62  | Calbindin              | N121A/1  | Pannexin-2                                      | N332B/15  | BAF53b                         | N479/12  | VAPA                     |
| L113/13  | Homer1L                | N123/19  | Histone H3-pThr11                               | N336B/83  | BAF53a                         | N479/22  | VAPA                     |
| L113/26  | Homer1L                | N123/48  | Histone H3-pThr11                               | N341/12   | LRRK1                          | N483/26  | Rufy3                    |
| L113/27  | Homer1L                | N125/10  | Thorase/Atad1                                   | N343/26   | NrCAM                          | N483/84  | Rufy3                    |
| L113/28  | Homer1L                | N126B/31 | Neuregulin-CRD (Cysteine-rich domain, Type III) | N345/51   | REEP1                          | N483/126 | Rufy3                    |
| L113/29  | Homer1L                | N128A/2  | Haspin/GSG2                                     | N347/42   | ATAT1                          | N485/22  | Prnt2                    |
| L113/44  | Homer1L                | N128A/4  | Maltose binding protein (MBP)                   | N349/96   | Foxi2                          | N486/25  | c-Fos                    |
| L113/62  | Homer1L/S              | N129/15  | Mad3 (human)                                    | N356/9    | SVOP                           | N486/32  | c-Fos                    |
| L113/130 | Homer1L/S              | N132A/12 | KLH                                             | N357/6*   | PINK1                          | N486/76  | c-Fos                    |

**Supplementary Table 2.** List of R-mAbs and their targets that were successfully cloned into the IgG2a mammalian expression plasmid using the sequence-based Gibson Assembly cloning method. \* cloned from hybridomas with more than two V<sub>L</sub> sequences. \*\* cloned from a hybridoma with two V<sub>L</sub> and two V<sub>H</sub> sequences.
