# Supplementary material for: NeuroMabSeq: high volume acquisition, processing, and curation of hybridoma sequences and their use in generating recombinant monoclonal antibodies and scFvs for neuroscience research
Source: PubMed Central journal article supplement — bioRxiv. 2023 Jun 30:2023.06.28.546392. Preprint. [Version 1] doi: 10.1101/2023.06.28.546392 (PMC10327083; doi:10.1101/2023.06.28.546392), 2023-06-30
Supplement: media-4.pdf [file media-4.pdf]

**Supplementary Table 3. List of R-mAbs successfully transferred to IgG subclass-switched expression plasmids.**

| Transferred to IgG2b Expression Plasmid |                                           |          |                                | Transferred to IgG1 Expression Plasmid |                                 |
|-----------------------------------------|-------------------------------------------|----------|--------------------------------|----------------------------------------|---------------------------------|
| R-mAb                                   | Target                                    | R-mAb    | Target                         | R-mAb                                  | Target                          |
| A12/18                                  | Pan-Neurofascin (extracellular)           | N59/20   | GluN2B/NR2B glutamate receptor | A12/18                                 | Pan-Neurofascin (extracellular) |
| K7/45                                   | Kv1.5 K+ channel                          | N59/36   | GluN2B/NR2B glutamate receptor | K20/78                                 | Kv1.1 K+ channel                |
| K13/31                                  | Kv1.4 K+ channel                          | N68/6    | Nav1.7 Na+ channel             | K28/43                                 | PSD-95                          |
| K14/16                                  | Kv1.2 K+ channel                          | N69/46   | Shank3                         | K57/1                                  | Kv4.2 K+ channel (external)     |
| K17/70                                  | Kvbeta2 K+ channel                        | N70/28   | HCN1                           | K65/35                                 | CASPR/Neurexin IV               |
| K20/78                                  | Kv1.1 K+ channel                          | N76/8    | Ataxin-1, 11NQ                 | K75/41                                 | Kv4.3 K+ channel                |
| K28/43                                  | PSD-95                                    | N86/38   | GFP                            | L108/92                                | VIP                             |
| K39/25                                  | Kv2.1 K+ channel (external)               | N86/8    | GFP                            | L109/39                                | Calbindin                       |
| K57/1                                   | Kv4.2 K+ channel (external)               | N97A/31  | Neuroigin-1                    | L113/130                               | Homer1L/S                       |
| K64/15                                  | SAP97                                     | N106/36  | Ankyrin-G                      | L113/27                                | Homer1L                         |
| K65/35                                  | CASPR/Neurexin IV                         | N110/29  | Neuroigin-3                    | L118/80                                | VGAT                            |
| K66/38                                  | KChIP3 K+ channel                         | N112B/14 | Kir2.1 K+ channel              | L122/6                                 | Calretinin                      |
| K74/71                                  | Nav1.1 Na+ channel                        | N114/10  | HCN4                           | L122/68                                | Calretinin                      |
| K75/41                                  | Kv4.3 K+ channel                          | N133/21  | RGS14                          | L127/12                                | GAD65 + GAD67                   |
| K89/34                                  | Kv2.1 K+ channel                          | N133/35  | RGS14                          | L21/32                                 | GluA2/GluR2 glutamate receptor  |
| L6/60                                   | Slo1/BKAlpha maxi-K+ channel              | N134/12  | Nav1.8 Na+ channel             | L6/60                                  | Slo1/BKAlpha maxi-K+ channel    |
| L21/32                                  | GluA2/GluR2 glutamate receptor            | N149/25  | Olig1                          | L86/33                                 | AMIGO-1                         |
| L28/4                                   | Kv4.2 K+ channel                          | N151/3   | GABA(A)R, Delta                | N1/12                                  | KCC2                            |
| L57/46                                  | Cav1.2/1.3 Ca2+ channel                   | N168/6   | Navbeta4 Na+ channel           | N86/8                                  | Nav1.7 Na+ channel              |
| L60/4                                   | Copper ATPase 1 (Menke's disease protein) | N170A/1  | Neurexin-1-Beta                | N106/36                                | Ankyrin-G                       |
| L86/33                                  | AMIGO-1                                   | N178A/9  | Cav3.1 Ca2+ channel            | N112B/14                               | Kir2.1 K+ channel               |
| L86/36                                  | AMIGO-1                                   | N182/17  | QKI-6                          | N133/21                                | RGS14                           |
| L106/83                                 | Gephyrin                                  | N196/16  | PARIS/ZNF746                   | N134/12                                | Nav1.8 Na+ channel              |
| L107/39                                 | Neuroigin-2                               | N201/35  | Iduna/RNF146                   | N149/25                                | Olig1                           |
| L108/92                                 | VIP                                       | N206A/8  | GFAP                           | N170A/1                                | Neurexin-1-Beta                 |
| L109/39                                 | Calbindin                                 | N212/17  | TRIP8b (constant)              | N206A/8                                | GFAP                            |
| L113/27                                 | Homer1L                                   | N241A/34 | LRRK2/Dardarin, C-terminus     | N241A/34                               | LRRK2/Dardarin, C-terminus      |
| L113/130                                | Homer1L/S                                 | N244/5   | SynCAM4                        | N263/31                                | Cav1.2 Ca2+ channel             |
| L114/3                                  | Parvalbumin                               | N263/31  | Cav1.2 Ca2+ channel            | N28/9                                  | VGluT1                          |
| L115/13                                 | NPY/Neuropeptide Y                        | N289/16  | SUR1                           | N29/29                                 | VGluT2                          |
| L118/80                                 | VGAT                                      | N295B/66 | Arl13b                         | N295B/66                               | Arl13b                          |
| L122/6                                  | Calretinin                                | N308/48  | GluN1/NR1 glutamate receptor   | N308/48                                | GluN1/NR1 glutamate receptor    |
| L122/68                                 | Calretinin                                | N327/95  | GluN2A/NR2A glutamate receptor | N327/95                                | GluN2A/NR2A glutamate receptor  |
| L127/8                                  | GAD67                                     | N355/1   | GluA1/GluR1 glutamate receptor | N355/1                                 | GluA1/GluR1 glutamate receptor  |
| L127/12                                 | GAD65/67                                  | N410/17  | Kv3.2 K+ channel               | N410/17                                | Kv3.2 K+ channel                |
| N1/12                                   | KCC2                                      | N425/45  | VACHT                          | N425/45                                | VACHT                           |
| N3/26                                   | KCNT1/Slo2.2/Slack K+ channel             |          |                                | N52A/42                                | Mortalin/GRP75                  |
| N6/38                                   | VACHT                                     |          |                                | N59/20                                 | GluN2B/NR2B glutamate receptor  |
| N7/18                                   | Cavbeta1 Ca2+ channel                     |          |                                | N59/36                                 | GluN2B/NR2B glutamate receptor  |
| N11/33                                  | KCNT2/Slo2.1/Slick K+ channel             |          |                                | N6/38                                  | VACHT                           |
| N28/9                                   | VGlut1                                    |          |                                | N68/6                                  | Nav1.7 Na+ channel              |
| N29/29                                  | VGluT2                                    |          |                                | N70/28                                 | HCN1                            |
| N52A/42                                 | Mortalin/GRP75                            |          |                                | N86/38                                 | GFP                             |

**Supplementary Table 3.** List of R-mAbs and their targets that were successfully transferred from the IgG2a mammalian expression plasmid into either an IgG2b and/or IgG1 mammalian expression plasmid using restriction digest/ligation-based cloning.
