# Supplementary material for: NeuroMabSeq: high volume acquisition, processing, and curation of hybridoma sequences and their use in generating recombinant monoclonal antibodies and scFvs for neuroscience research
Source: PubMed Central journal article supplement — bioRxiv. 2023 Jun 30:2023.06.28.546392. Preprint. [Version 1] doi: 10.1101/2023.06.28.546392 (PMC10327083; doi:10.1101/2023.06.28.546392), 2023-06-30
Supplement: media-5.pdf [file media-5.pdf]

**Supplementary Table 4. List of scFvs successfully cloned via sequence-based cloning.**

| scFv    | Target                             | Plasmid  | Tags                  | scFv     | Target                                                | Plasmid  | Tags                 |
|---------|------------------------------------|----------|-----------------------|----------|-------------------------------------------------------|----------|----------------------|
| 1D8     | LRRK2/Dardarin-pSer910             | pcDNA3.4 | HA<br>sortase<br>His  | N67/15   | TrpC5                                                 | pcDNA3.4 | HA<br>sortase<br>His |
| A12/18  | Pan-Neurofascin<br>(extracellular) | pcDNA3.1 | sortase<br>His        | N68/6    | Nav1.7 Na channel                                     | pcDNA3.1 | sortase<br>His       |
| A12/18  | Pan-Neurofascin<br>(extracellular) | pcDNA3.1 | HA<br>sortase<br>His  | N69/46   | Shank3                                                | pcDNA3.4 | HA<br>sortase<br>His |
| K7/45   | Kv1.5 K channel                    | pcDNA3.4 | HA<br>sortase<br>His  | N86/20   | GFP                                                   | pcDNA3.4 | HA<br>sortase<br>His |
| K14/16  | Kv1.2 K channel                    | pcDNA3.1 | HA<br>His             | N86/38   | GFP                                                   | pcDNA3.1 | HA<br>His            |
| K17/70  | Kvbeta2/KCNAB2 K<br>channel        | pcDNA3.4 | HA<br>sortase<br>His  | N86/44   | GFP                                                   | pcDNA3.4 | HA<br>sortase<br>His |
| K20/78  | Kv1.1 K channel                    | pcDNA3.1 | sortase<br>His        | N93A/49  | GABA(B)R1                                             | pcDNA3.4 | HA<br>sortase<br>His |
| K20/78  | Kv1.1 K channel                    | pcDNA3.1 | HA<br>sortase<br>His  | N100/13  | GST                                                   | pcDNA3.4 | HA<br>sortase<br>His |
| K28/38  | PSD-95                             | pcDNA3.4 | HA<br>sortase<br>His  | N103/31  | Aldh1L1                                               | pcDNA3.1 | sortase<br>His       |
| K28/42  | PSD-95 PSD-93                      | pcDNA3.4 | HA<br>sortase<br>His  | N103/31  | Aldh1L1                                               | pcDNA3.1 | HA<br>sortase<br>His |
| K28/43  | PSD-95                             | pcDNA3.4 | HA<br>His             | N105/13  | Ankyrin-B                                             | pcDNA3.4 | HA<br>sortase<br>His |
| K28/43  | PSD-95                             | pcDNA3.1 | HA<br>Flag<br>sortase | N105/17  | Ankyrin-B                                             | pcDNA3.4 | HA<br>sortase<br>His |
| K28/74  | PSD-95                             | pcDNA3.4 | HA<br>sortase<br>His  | N106/20  | Ankyrin-G                                             | pcDNA3.4 | HA<br>sortase<br>His |
| K39/25  | Kv1.2 K channel<br>(extracellular) | pcDNA3.4 | HA<br>His             | N114/10  | HCN4                                                  | pcDNA3.1 | HA<br>sortase<br>His |
| K56A/50 | CASK                               | pcDNA3.4 | HA<br>sortase<br>His  | N125/10  | Thorase/Atad1                                         | pcDNA3.4 | HA<br>sortase<br>His |
| K56A/57 | CASK                               | pcDNA3.4 | HA<br>sortase<br>His  | N126B/31 | Neuregulin-CRD<br>(Cysteine-rich<br>domain, Type III) | pcDNA3.4 | HA<br>sortase<br>His |
| K60/73  | KChIP2b K channel                  | pcDNA3.4 | HA<br>sortase<br>His  | N129/15  | Mad3 (human)                                          | pcDNA3.4 | HA<br>sortase<br>His |
| K65/35  | CASPR/Neurexin IV                  | pcDNA3.1 | sortase<br>His        | N133/21  | RGS14                                                 | pcDNA3.1 | sortase<br>His       |
| K66/27  | KChIP3 K channel                   | pcDNA3.4 | HA<br>sortase<br>His  | N133/35  | RGS14                                                 | pcDNA3.4 | HA<br>sortase<br>His |
| K66/38  | KChIP3 K channel                   | pcDNA3.4 | HA<br>sortase<br>His  | N134/12  | Nav1.8 Na channel                                     | pcDNA3.1 | sortase<br>His       |
| K66/59  | KChIP3 K channel                   | pcDNA3.4 | HA<br>sortase<br>His  | N134/12  | Nav1.8 Na channel                                     | pcDNA3.1 | HA<br>sortase<br>His |
| K89/34  | Kv2.1 K channel                    | pcDNA3.4 | HA<br>His             | N144/17  | Gamma-<br>protocadherin-A3                            | pcDNA3.4 | HA<br>sortase<br>His |

|                |                                    |          |                       |                |                                          |          |                      |
|----------------|------------------------------------|----------|-----------------------|----------------|------------------------------------------|----------|----------------------|
| K89/34         | Kv2.1 K channel                    | pcDNA3.1 | HA<br>Flag<br>sortase | N144/32        | Pan-Gamma-<br>protocadherin-A            | pcDNA3.4 | HA<br>sortase<br>His |
| K89/34<br>Flag | Kv2.1 K channel                    | pcDNA3.4 | HA<br>His<br>Flag     | N149/25        | Olig1                                    | pcDNA3.4 | HA<br>sortase<br>His |
| K89/41         | Kv2.1 K channel                    | pcDNA3.4 | HA<br>sortase<br>His  | N151/3         | GABA(A)R, Delta                          | pcDNA3.4 | HA<br>sortase<br>His |
| K96/7          | Pancortin                          | pcDNA3.4 | HA<br>sortase<br>His  | N159/5         | Pan-Gamma-<br>protocadherin-<br>Constant | pcDNA3.4 | HA<br>sortase<br>His |
| L11A/41        | Pan-Neurofascin                    | pcDNA3.4 | HA<br>sortase<br>His  | N160/21        | SynDIG3/Tmem91                           | pcDNA3.4 | HA<br>sortase<br>His |
| L23/27         | Kv1.3 K channel                    | pcDNA3.1 | HA<br>sortase<br>His  | N170A/1        | Neurexin-1-Beta                          | pcDNA3.1 | HA<br>sortase<br>His |
| L24/1          | IP3 receptor, type 1               | pcDNA3.4 | HA<br>sortase<br>His  | N170A/26       | Neurexin-1-Beta                          | pcDNA3.4 | HA<br>sortase<br>His |
| L48A/9         | Cav1.3 Ca2 channel                 | pcDNA3.4 | HA<br>sortase<br>His  | N183/15        | QKI-7                                    | pcDNA3.4 | HA<br>sortase<br>His |
| L61C/30        | Kv2.1 K channel                    | pcDNA3.4 | HA<br>sortase<br>His  | N185/7         | NALCN                                    | pcDNA3.4 | HA<br>sortase<br>His |
| L71/5          | Kv1.4 K channel<br>(extracellular) | pcDNA3.4 | HA<br>sortase<br>His  | N196/16        | PARIS/ZNF746                             | pcDNA3.4 | HA<br>sortase<br>His |
| L76/36         | Kv1.2 K channel                    | pcDNA3.4 | HA<br>sortase<br>His  | N201/35        | Iduna/RNF146                             | pcDNA3.4 | HA<br>sortase<br>His |
| L83/11         | Kv2.1 K channel                    | pcDNA3.4 | HA<br>sortase<br>His  | N206A/8        | GFAP                                     | pcDNA3.1 | sortase<br>His       |
| L86/33         | AMIGO-1                            | pcDNA3.4 | HA<br>sortase<br>His  | N207/27        | LRP4 (extracellular)                     | pcDNA3.4 | HA<br>sortase<br>His |
| L107/39        | Neuroigin-2                        | pcDNA3.1 | sortase<br>His        | N212/17        | TRIP8b (constant)                        | pcDNA3.4 | HA<br>sortase<br>His |
| L107/90        | Neuroigin-2                        | pcDNA3.4 | HA<br>sortase<br>His  | N221/17        | TRIP8b (constant)                        | pcDNA3.1 | sortase<br>His       |
| L107/95        | Neuroigin-2                        | pcDNA3.4 | HA<br>sortase<br>His  | N212A/34       | TRIP8b (exon 1b)                         | pcDNA3.4 | HA<br>sortase<br>His |
| L109/57        | Calbindin                          | pcDNA3.4 | HA<br>His             | N221/17        | TrpV1                                    | pcDNA3.4 | HA<br>sortase<br>His |
| L113/13        | Homer1L                            | pcDNA3.1 | sortase<br>His        | N225A/10       | FGF13/FHF2, B<br>isoform                 | pcDNA3.4 | HA<br>sortase<br>His |
| L113/13        | Homer1L                            | pcDNA3.1 | HA<br>sortase<br>His  | N241A/34       | LRRK2/Dardarin, C-<br>terminus           | pcDNA3.1 | sortase<br>His       |
| L113/130       | Homer1L/S                          | pcDNA3.1 | sortase<br>His        | N263/31<br>LC1 | Cav1.2 Ca2 channel                       | pcDNA3.4 | HA<br>His            |
| L113/130       | Homer1L/S                          | pcDNA3.1 | HA<br>sortase<br>His  | N270/47        | Synaptotagmin-6                          | pcDNA3.4 | HA<br>sortase<br>His |
| L113/27        | Homer1L                            | pcDNA3.1 | sortase<br>His        | N276A/15       | Synaptotagmin-9                          | pcDNA3.4 | HA<br>sortase<br>His |
| L113/27        | Homer1L                            | pcDNA3.1 | HA<br>sortase<br>His  | N289/16        | SUR1                                     | pcDNA3.4 | HA<br>sortase<br>His |

|             |                    |          |                      |          |                                   |          |                      |
|-------------|--------------------|----------|----------------------|----------|-----------------------------------|----------|----------------------|
| L113/28     | Homer1L            | pcDNA3.4 | HA<br>sortase<br>His | N295B/66 | Arl13b                            | pcDNA3.1 | HA<br>His            |
| L113/44     | Homer1L            | pcDNA3.4 | HA<br>sortase<br>His | N355/1   | GluA1/GluR1<br>glutamate receptor | pcDNA3.1 | sortase<br>His       |
| L114/3      | Parvalbumin        | pCDNA3.4 | HA<br>His            | N363/71  | Kir6.2 K channel                  | pcDNA3.4 | HA<br>sortase<br>His |
| L114/3 Flag | Parvalbumin        | pcDNA3.4 | HA<br>His<br>Flag    | N366/60  | Kir6.1 K channel                  | pcDNA3.4 | HA<br>sortase<br>His |
| L114/81     | Parvalbumin        | pCDNA3.4 | HA<br>His            | N367/51  | Shank1 and Shank3                 | pcDNA3.4 | HA<br>sortase<br>His |
| L115/13     | NPY/Neuropeptide Y | pcDNA3.1 | sortase<br>His       | N372B/1  | Kv2.2 K channel                   | pcDNA3.4 | HA<br>sortase<br>His |
| L115/13     | NPY/Neuropeptide Y | pcDNA3.1 | HA<br>sortase<br>His | N372B/60 | Kv2.2 K channel                   | pcDNA3.4 | HA<br>sortase<br>His |
| L117/1      | IRSp53/BAIAP2      | pcDNA3.1 | sortase<br>His       | N375/67  | Kv3.3 K channel                   | pcDNA3.4 | HA<br>sortase<br>His |
| L117/1      | IRSp53/BAIAP2      | pcDNA3.1 | HA<br>sortase<br>His | N393/2   | Beta4-spectrin                    | pcDNA3.4 | HA<br>sortase<br>His |
| L118/14     | VGAT               | pcDNA3.4 | HA<br>sortase<br>His | N398A/34 | GABA(A)R, Alpha4                  | pcDNA3.4 | HA<br>sortase<br>His |
| L120/12     | Collybistin        | pcDNA3.1 | sortase<br>His       | N399/19  | GABA(A)R, Alpha2                  | pcDNA3.4 | HA<br>sortase<br>His |
| L121/133    | nNOS/NOS1          | pcDNA3.4 | HA<br>sortase<br>His | N402/46  | Thyroid hormone<br>receptor beta1 | pcDNA3.4 | HA<br>sortase<br>His |
| L121/136    | nNOS/NOS1          | pcDNA3.4 | HA<br>sortase<br>His | N403/63  | Pan-Thyroid<br>hormone receptor   | pcDNA3.4 | HA<br>sortase<br>His |
| L122/6      | Calretinin         | pCDNA3.4 | HA<br>His            | N414/25  | NCKX4                             | pcDNA3.4 | HA<br>sortase<br>His |
| L122/68     | Calretinin         | pcDNA3.1 | sortase<br>His       | N422/18  | GluN2C/NR2C<br>glutamate receptor | pcDNA3.4 | HA<br>sortase<br>His |
| L124/59     | Bassoon            | pcDNA3.1 | sortase<br>His       | N432/21  | VSP                               | pcDNA3.4 | HA<br>sortase<br>His |
| L124/59     | Bassoon            | pcDNA3.1 | HA<br>sortase<br>His | N432/63  | VSP                               | pcDNA3.4 | HA<br>sortase<br>His |
| L125/129    | Pan-Synapsin       | pcDNA3.1 | sortase<br>His       | N448/88  | Kv8.2 K channel                   | pcDNA3.4 | HA<br>sortase<br>His |
| L127/8      | GAD67              | pcDNA3.1 | sortase<br>His       | N449/73  | VMAT2                             | pcDNA3.4 | HA<br>sortase<br>His |
| L130/1      | Tiam1              | pcDNA3.4 | HA<br>sortase<br>His | N452/73  | GABA(A)R,<br>Gamma2L/S            | pcDNA3.1 | sortase<br>His       |
| L131/17     | SPHKAP             | pcDNA3.4 | HA<br>sortase<br>His | N452/73  | GABA(A)R,<br>Gamma2L/S            | pcDNA3.1 | HA<br>sortase<br>His |
| L131/20     | SPHKAP             | pcDNA3.4 | HA<br>sortase<br>His | N452/81  | GABA(A)R,<br>Gamma2L/S            | pcDNA3.1 | sortase<br>His       |
| L131/27     | SPHKAP             | pcDNA3.4 | HA<br>sortase<br>His | N452/81  | GABA(A)R,<br>Gamma2L/S            | pcDNA3.1 | HA<br>sortase<br>His |

|            |                                |          |                      |                                           |                                |          |                      |
|------------|--------------------------------|----------|----------------------|-------------------------------------------|--------------------------------|----------|----------------------|
| N1/12      | KCC2                           | pcDNA3.1 | HA<br>sortase<br>His | N471/27                                   | Kv1.7 K channel                | pcDNA3.4 | HA<br>sortase<br>His |
| N16B/8     | Kv3.1b K channel               | pcDNA3.1 | sortase<br>His       | N479/107                                  | VAPA/B                         | pcDNA3.4 | HA<br>sortase<br>His |
| N18/28     | PSD-93/Chapsyn-110             | pcDNA3.4 | HA<br>sortase<br>His | N479/12                                   | VAPA                           | pcDNA3.4 | HA<br>sortase<br>His |
| N22/21     | Shank1                         | pcDNA3.4 | HA<br>sortase<br>His | N483/26                                   | Rufy3                          | pcDNA3.4 | HA<br>sortase<br>His |
| N23B/6     | Shank2                         | pcDNA3.4 | HA<br>sortase<br>His | N483/84                                   | Rufy3                          | pcDNA3.4 | HA<br>sortase<br>His |
| N23B/49    | Pan-Shank                      | pcDNA3.1 | HA<br>sortase<br>His | N483/126                                  | Rufy3                          | pcDNA3.1 | sortase<br>His       |
| N28/9      | VGlut1                         | pcDNA3.1 | HA<br>His            | N483/126                                  | Rufy3                          | pcDNA3.1 | HA<br>sortase<br>His |
| N28/9 Flag | VGlut1                         | pcDNA3.4 | HA<br>His<br>Flag    | N486/32                                   | c-Fos                          | pcDNA3.4 | HA<br>His            |
| N29/29     | VGlut2                         | pcDNA3.1 | HA<br>His            | N486/76                                   | c-Fos                          | pcDNA3.4 | HA<br>sortase<br>His |
| N43/6      | Kv7.4/KCNQ4 K channel          | pcDNA3.4 | HA<br>sortase<br>His | N112B/29                                  | Kir2.1 K+ channel              | pcDNA3.4 | HA<br>sortase<br>His |
| N53/32     | BKbeta2 K channel              | pcDNA3.4 | HA<br>sortase<br>His | N140A/12                                  | SALM5/LRFN5                    | pcDNA3.4 | HA<br>sortase<br>His |
| N52A/42    | Mortalin/GRP75                 | pcDNA3.1 | HA<br>His            | N155/9                                    | Uncx                           | pcDNA3.4 | HA<br>sortase<br>His |
| N52B/27    | SALM2/LRFN1                    | pcDNA3.4 | HA<br>sortase<br>His | N294A/6                                   | Brevican                       | pcDNA3.4 | HA<br>sortase<br>His |
| N59/20     | GluN2B/NR2B glutamate receptor | pcDNA3.1 | sortase<br>His       | N312/10                                   | NSD1                           | pcDNA3.4 | HA<br>sortase<br>His |
| N59/20     | GluN2B/NR2B glutamate receptor | pcDNA3.1 | HA<br>sortase<br>His | N411/51                                   | Arx                            | pcDNA3.4 | HA<br>sortase<br>His |
| N59/36     | GluN2B/NR2B glutamate receptor | pcDNA3.1 | HA<br>sortase<br>His | N416/57                                   | GluN3A/NR3A glutamate receptor | pcDNA3.4 | HA<br>sortase<br>His |
| N59/36     | GluN2B/NR2B glutamate receptor | pcDNA3.1 | HA<br>His            | N424/45                                   | Glycine receptor Alpha3        | pcDNA3.4 | HA<br>sortase<br>His |
| D4/154     | Kv2.1 K+ channel               | pcDNA3.4 | HA<br>sortase<br>His | N428/12                                   | WRN                            | pcDNA3.4 | HA<br>sortase<br>His |
| K57/41     | Kv4.2 K+ channel (external)    | pcDNA3.4 | HA<br>sortase<br>His | N452/30                                   | GABA-A-R-Gamma2L/S, GABRG2     | pcDNA3.4 | HA<br>sortase<br>His |
| L24/21     | IP3R                           | pcDNA3.4 | HA<br>sortase<br>His | N473/36.3                                 | Cavbeta3 Ca2+ channel          | pcDNA3.4 | HA<br>sortase<br>His |
| L86/14     | AMIGO-1                        | pcDNA3.4 | HA<br>sortase<br>His | N485/22                                   | Prrt2                          | pcDNA3.4 | HA<br>sortase<br>His |
| L86/2      | AMIGO-1                        | pcDNA3.4 | HA<br>sortase<br>His | <b>V<sub>L</sub>-linker-V<sub>H</sub></b> |                                |          |                      |
| L106/23    | Gephyrin                       | pcDNA3.4 | HA<br>sortase<br>His | L6/60                                     | Slo1/BKAlpha maxi-K channel    | pcDNA3.4 | HA<br>sortase<br>His |

|          |                                      |          |                      |          |                  |          |                      |
|----------|--------------------------------------|----------|----------------------|----------|------------------|----------|----------------------|
| L114/38  | Parvalbumin                          | pcDNA3.4 | HA<br>sortase<br>His | N86/8    | GFP              | pcDNA3.4 | HA<br>sortase<br>His |
| L122/144 | Calretinin                           | pcDNA3.4 | HA<br>sortase<br>His | N95/35   | GABA(A)R, Alpha1 | pcDNA3.4 | HA<br>sortase<br>His |
| L123/46  | GABA(A)R, Theta                      | pcDNA3.4 | HA<br>sortase<br>His | N106/36  | Ankyrin-G        | pcDNA3.4 | HA<br>sortase<br>His |
| N7/18    | Cavbeta1 Ca <sup>2+</sup><br>channel | pcDNA3.4 | HA<br>sortase<br>His | N112B/14 | Kir2.1 K channel | pcDNA3.4 | HA<br>sortase<br>His |
| N56/21   | FGF14a                               | pcDNA3.4 | HA<br>sortase<br>His | N377/20  | MAP3K12          | pcDNA3.1 | HA<br>sortase<br>His |
| N112/16  | Kir2.1 K <sup>+</sup> channel        | pcDNA3.4 | HA<br>sortase<br>His |          |                  |          |                      |

**Supplementary Table 4.** List of scFvs and their targets that were successfully cloned into either pcDNA3.1 or pcDNA3.4 mammalian expression plasmids using the sequence-based Gibson Assembly cloning method. All are in the V<sub>H</sub>-linker-V<sub>L</sub> format except as noted. Tags indicate the presence of HA or Flag epitope tags, a sortase labelling tag and/or the 6xHis purification tag at the C-terminus of the scFv.
